# Supplementary material
Source: PubMed Central journal article supplement (PMC8557475)
Supplement: kfab107_supplementary_data.pdf [file kfab107_supplementary_data.pdf]

## **Supplemental Material**

### **Mast cells promote nitrogen mustard mediated toxicity in the lung associated with proinflammatory cytokine and bioactive lipid mediator production**

Angela Cruz-Hernandez<sup>1</sup>, Ryan P. Mendoza<sup>1</sup>, Kathleen Nguyen<sup>1</sup>, Anna Harder<sup>2</sup>, Christopher M. Evans<sup>2</sup>, Alison K. Bauer<sup>3</sup>, Neera Tewari-Singh<sup>4</sup>, Jared M. Brown<sup>1</sup>

<sup>1</sup>Department of Pharmaceutical Sciences, Skaggs School of Pharmacy and Pharmaceutical Sciences, The University of Colorado Anschutz Medical Campus, Aurora, Colorado, United States of America

<sup>2</sup>Division of Pulmonary Sciences and Critical Care Medicine, The University of Colorado Anschutz Medical Campus, Aurora Colorado, United States of America

<sup>3</sup>Department of Environmental and Occupational Health, Colorado School of Public Health, The University of Colorado Anschutz Medical Campus, Aurora, Colorado, United States of America

<sup>4</sup>Department of Pharmacology and Toxicology, Michigan State University, East Lansing, Michigan, United States of America

**Table S1. Targeted lipidomics yields changes in both arachidonic acid and linoleic acid pathways observed in C57BL/6J mice compared to Kit<sup>W-sh</sup> mice after nitrogen mustard exposure.**

| <b>Compound</b>         | <b>Control C57BL/6J (pg/mL)</b> | <b>Treated C57BL/6J (pg/mL)</b> | <b>Control Kit<sup>W-sh</sup> (pg/mL)</b> | <b>Treated Kit<sup>W-sh</sup> (pg/mL)</b> |
|-------------------------|---------------------------------|---------------------------------|-------------------------------------------|-------------------------------------------|
| <b>12-HETE</b>          | 1893.124 ± 2691.323             | 599.950 ± 320.817               | 2154.246 ± 764.643                        | 715.911 ± 416.973                         |
| <b>14-HDHA</b>          | 271.0467 ± 87.422               | 171.625 ± 63.761                | 485.761 ± 438.781                         | 125.981 ± 33.141                          |
| <b>7(epi)Maresin R1</b> | N.D                             | N.D                             | N.D                                       | N.D                                       |
| <b>7(R)Maresin</b>      | N.D                             | N.D                             | N.D                                       | N.D                                       |
| <b>12-HEPE</b>          | 30.0936 ± 67.291                | N.D                             | N.D                                       | N.D                                       |
| <b>15-HETE</b>          | 80.134 ± 69.879                 | 45.143 ± 23.084                 | 63.832 ± 46.953                           | 51.533 ± 16.284                           |
| <b>13-HOTrE</b>         | 22.939 ± 26.087                 | 35.635 ± 39.193                 | 59.601 ± 81.700                           | 60.346 ± 51.058                           |
| <b>15-HETrE</b>         | 18.479 ± 17.844                 | 7.513 ± 11.698                  | 9.442 ± 14.234                            | 10.687 ± 13.501                           |
| <b>10,17-DiHDoHE</b>    | N.D                             | N.D                             | N.D                                       | N.D                                       |
| <b>17-HDHA</b>          | 170.645 ± 81.336                | 172.717 ± 73.113                | 298.744 ± 270.854                         | 142.936 ± 43.919                          |
| <b>17R-RVD1</b>         | N.D                             | N.D                             | N.D                                       | N.D                                       |
| <b>RVD1</b>             | N.D                             | N.D                             | N.D                                       | N.D                                       |
| <b>RVD2</b>             | N.D                             | N.D                             | N.D                                       | N.D                                       |
| <b>RVD3</b>             | N.D                             | N.D                             | N.D                                       | N.D                                       |
| <b>15-HEPE</b>          | N.D                             | N.D                             | N.D                                       | N.D                                       |
| <b>18-HEPE</b>          | N.D                             | N.D                             | N.D                                       | N.D                                       |
| <b>RVD5</b>             | N.D                             | N.D                             | N.D                                       | N.D                                       |
| <b>13-HODE</b>          | 341.723 ± 421.009               | 382.084 ± 450.512               | N.D                                       | 578.963 ± 463.379                         |
| <b>13-OxoODE</b>        | 74.653 ± 51.723                 | 23.132 ± 36.080                 | N.D                                       | N.D                                       |
| <b>5,15-DiHETE</b>      | N.D                             | N.D                             | N.D                                       | N.D                                       |
| <b>LTB4</b>             | 8.162 ± 18.250                  | N.D                             | N.D                                       | N.D                                       |
| <b>LXA4 Isomers</b>     | N.D                             | N.D                             | N.D                                       | N.D                                       |
| <b>LXB4</b>             | N.D                             | N.D                             | N.D                                       | N.D                                       |
| <b>5-HEPE</b>           | N.D                             | N.D                             | N.D                                       | N.D                                       |
| <b>5-HETE</b>           | N.D                             | N.D                             | N.D                                       | N.D                                       |
| <b>14(15)-EET</b>       | 53.699 ± 36.270                 | 38.091 ± 4.258                  | 57.0341 ± 27.702                          | 55.0773 ± 25.845                          |
| <b>LTD4</b>             | 33.110 ± 74.0359                | N.D                             | 86.161 ± 107.771                          | N.D                                       |
| <b>LTE4</b>             | 162.504 ± 245.866               | N.D                             | 773.532 ± 803.804                         | N.D *                                     |
| <b>12-HHTrE</b>         | 167.123 ± 209.783               | N.D                             | N.D                                       | N.D                                       |
| <b>(11B)PGF2a</b>       | N.D                             | N.D                             | N.D                                       | N.D                                       |
| <b>6a-PG I1</b>         | 12.260 ± 19.344                 | N.D                             | N.D                                       | N.D                                       |
| <b>6-keto-PGF1a</b>     | 229.598 ± 133.611               | 171.611 ± 44.616                | 102.382 ± 104.583                         | 103.735 ± 90.041                          |
| <b>Carb-TBX A2</b>      | N.D                             | N.D                             | N.D                                       | N.D                                       |
| <b>PGD2</b>             | N.D                             | 22.422 ± 6.685 * †              | N.D                                       | 10.013 ± 8.336 * †                        |
| <b>PGE2</b>             | 49.895 ± 31.441                 | 44.194 ± 53.429                 | N.D                                       | 24.815 ± 39.861                           |

|                        |                    |                      |                     |                     |
|------------------------|--------------------|----------------------|---------------------|---------------------|
| <b>PGF2a Isomers</b>   | 60.328 ± 51.353    | 46.883 ± 11.492      | 60.112 ± 33.0140    | 36.991 ± 10.241     |
| <b>TXB2</b>            | 14.584 ± 32.611    | N.D                  | N.D                 | N.D                 |
| <b>11(12)-EET</b>      | N.D                | N.D                  | N.D                 | N.D                 |
| <b>8(9)-EET</b>        | N.D                | N.D                  | N.D                 | N.D                 |
| <b>17(18)-EpETE</b>    | N.D                | N.D                  | N.D                 | N.D                 |
| <b>12(13)-EpOME</b>    | 531.140 ± 485.892  | 1433.888 ± 719.723   | 378.579 ± 217.317   | 1355.0243 ± 636.334 |
| <b>9(10)-EpOME</b>     | 235.0409 ± 124.974 | 426.844 ± 217.916    | 140.911 ± 38.503    | 390.312 ± 181.540   |
| <b>RVE1</b>            | N.D                | N.D                  | N.D                 | N.D                 |
| <b>11,12-DiHETrE</b>   | 13.122 ± 21.604    | 56.574 ± 9.826 *     | N.D                 | 36.620 ± 30.977     |
| <b>14,15-DiHETrE</b>   | 13.480 ± 22.0881   | 36.913 ± 40.692      | N.D                 | 34.159 ± 38.557     |
| <b>5,6-DiHETrE</b>     | N.D                | N.D                  | N.D                 | N.D                 |
| <b>19,20-DiHDPA</b>    | N.D                | N.D                  | N.D                 | N.D                 |
| <b>17,18-DiHETE</b>    | N.D                | 28.653 ± 22.531      | N.D                 | 24.635 ± 31.607     |
| <b>12(13)-DiHOME</b>   | 262.509 ± 208.400  | 1111.651 ± 619.806 * | 238.826 ± 277.326   | 959.842 ± 481.733   |
| <b>9(10)-DiHOME</b>    | 471.313 ± 367.974  | 1449.590 ± 693.227 * | 455.0292 ± 350.0160 | 1160.823 ± 520.889  |
| <b>9-HODE</b>          | 353.535 ± 323.284  | 366.612 ± 176.895    | 173.0497 ± 25.933   | 478.724 ± 253.292   |
| <b>9-OxoODE</b>        | 83.154 ± 17.111    | 106.182 ± 27.913     | 11.638 ± 23.276     | 105.502 ± 67.872 *  |
| <b>11-HETE</b>         | N.D                | N.D                  | N.D                 | N.D                 |
| <b>8-HETE</b>          | 15.343 ± 6.363     | 17.0941 ± 7.583      | 27.300 ± 16.319     | 24.298 ± 6.286      |
| <b>8-iso-15R-PGF2a</b> | N.D                | N.D                  | N.D                 | N.D                 |
| <b>8-iso-PGF2a</b>     | N.D                | N.D                  | N.D                 | N.D                 |
| <b>11-HDoHE</b>        | 270.310 ± 107.723  | 166.0250 ± 71.165    | 437.722 ± 381.798   | 136.714 ± 90.838    |

To further assess lipid mediators in both strains we analyzed the BALF utilizing mass spectrometry. There were increases in NM treated C57BL/6J mice compared to its control in the following compounds that were not seen in Kit<sup>W-sh</sup> mice: 11,12-DiHETrE, 12(13)-DiHOME, and 9(10)-DiHOME. 9-OxoODE was significantly increased NM treated Kit<sup>W-sh</sup> mice compared to control while it was not in C57BL/6J mice. Data is presented as the mean ± SM (n=4-6 animals/group); one way ANOVA with Tukey's *post hoc* test, \**p* ≤ 0.05 compared to its respective control, † *p* ≤ 0.05 compared between treated strains.

## Supplemental Figures

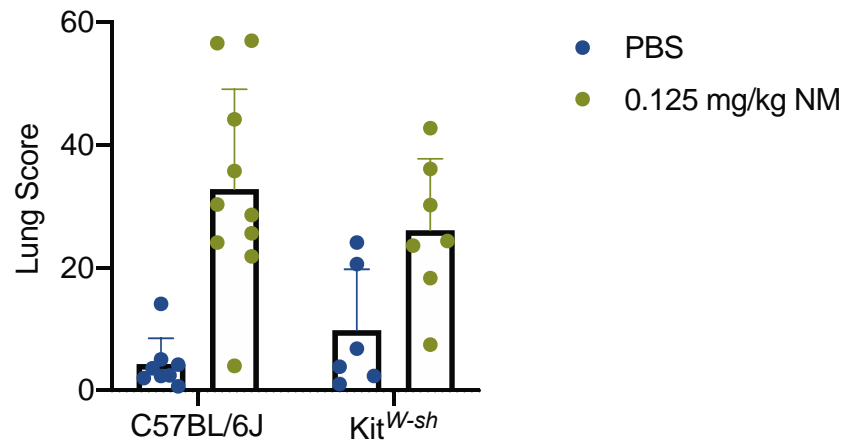

Figure S1. Damage quantified through lung scoring for NM exposed C57BL/6J and Kit<sup>W-sh</sup> mice.

To further confirm damage, lungs were scored to determine the degree of injury that C57BL/6J exhibited compared to Kit<sup>W-sh</sup> mice. C57BL/6J mice trended toward a higher injury score compared to Kit<sup>W-sh</sup> mice. Data is presented as the mean  $\pm$  SD (n=5-9 animals/ group); Two - way ANOVA with Tukey's *post hoc* test, \* $p \leq 0.05$ .

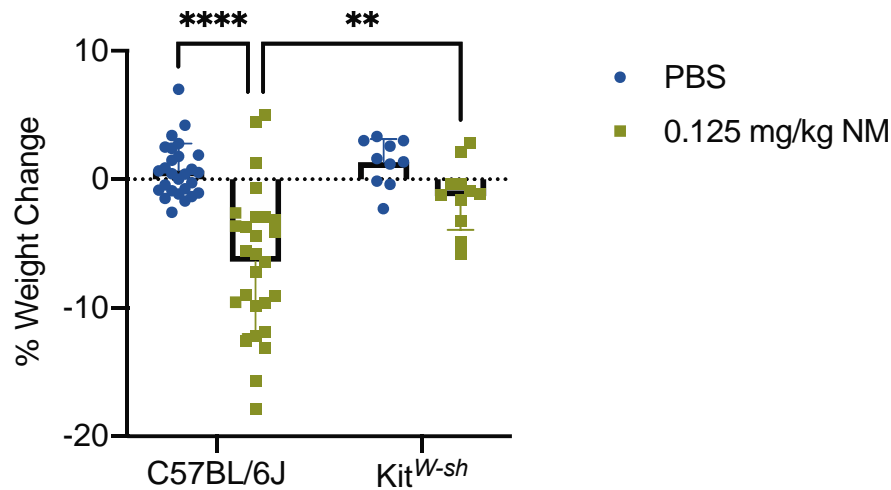

Figure S2. Nitrogen mustard exposure caused major weight changes in C57BL/6J compared to Kit<sup>W-sh</sup> mice.

Mice exhibited major weight differences after being dosed with NM for 72 hrs. Mice were weighed prior to dosing and weighed right after sacrificing. Treated C57BL/6J mice lost significantly more weight than Kit<sup>W-sh</sup> mice. Data is presented as the mean  $\pm$  SEM (n=11-27 animals/ group); two way ANOVA with Tukey's *post hoc* test, \* $p \leq 0.05$  compared to respective controls, †  $p \leq 0.05$  compared between treated strains.

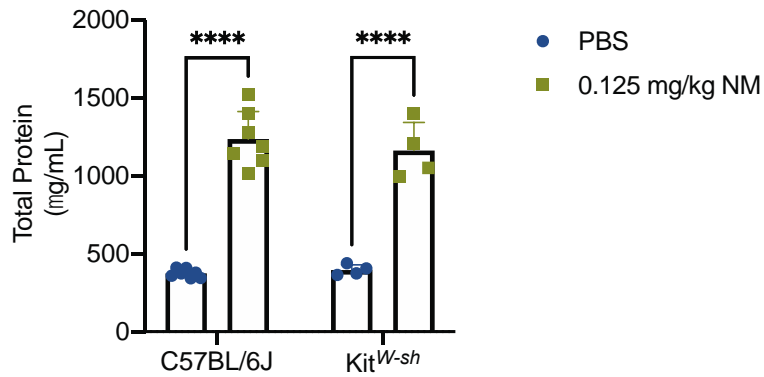

Figure S3. Nitrogen mustard causes damage in both C57BL/6J and Kit<sup>W-sh</sup> mice measured by protein presence in the bronchoalveolar lavage fluid.

To measure damage, we looked at total protein in the BALF of both C57BL/6J and Kit<sup>W-sh</sup> mice after 72 h NM exposure. Both C57BL/6J and Kit<sup>W-sh</sup> strains exhibited cellular damage compared to its respective control. Data is presented as the mean  $\pm$  SD (n=4-8 animals/ group); Two - way ANOVA with Tukey's *post hoc* test, \* $p \leq 0.05$ , \*\*  $p \leq 0.01$ , \*\*\*  $p \leq 0.001$ , \*\*\*\*  $p \leq 0.0001$ .

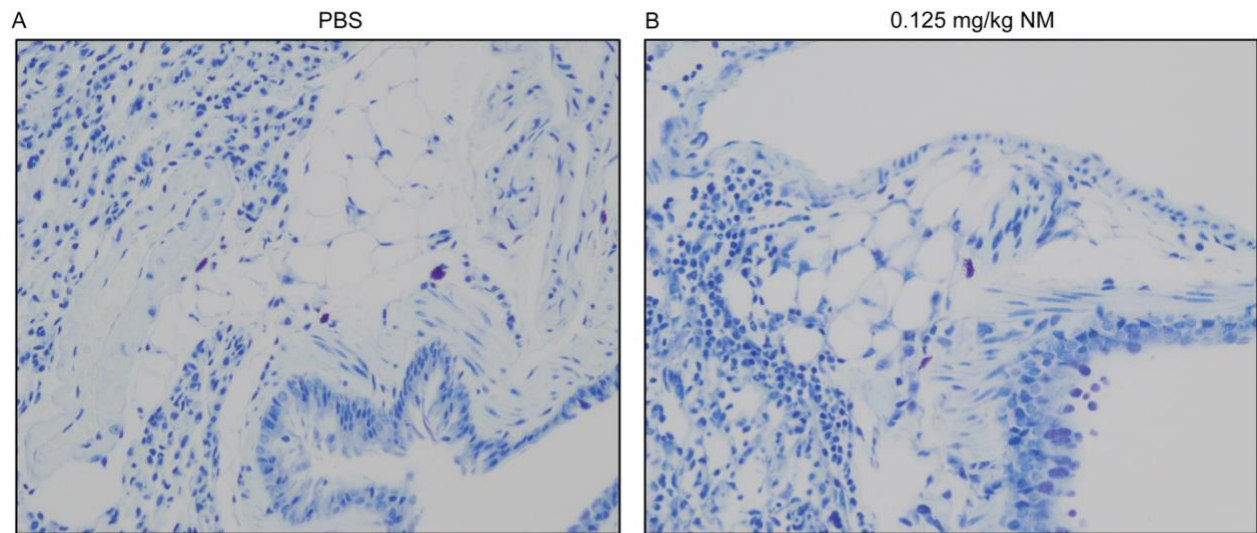

Figure S4. Nitrogen mustard exposure causes mast cell degranulation in vivo.

Representative histological findings in mice treated via oropharyngeal aspiration with PBS (control) or nitrogen mustard (0.125 mg/kg) for 72 hrs (N = 5-9 mice/group). The left lobe of the lung was removed and stained with toluidine blue. Black arrows are pointing to the mast cells present in the lung. Images were obtained using an Olympus light microscope at the 20x objective (indicated by 50 µm scale).

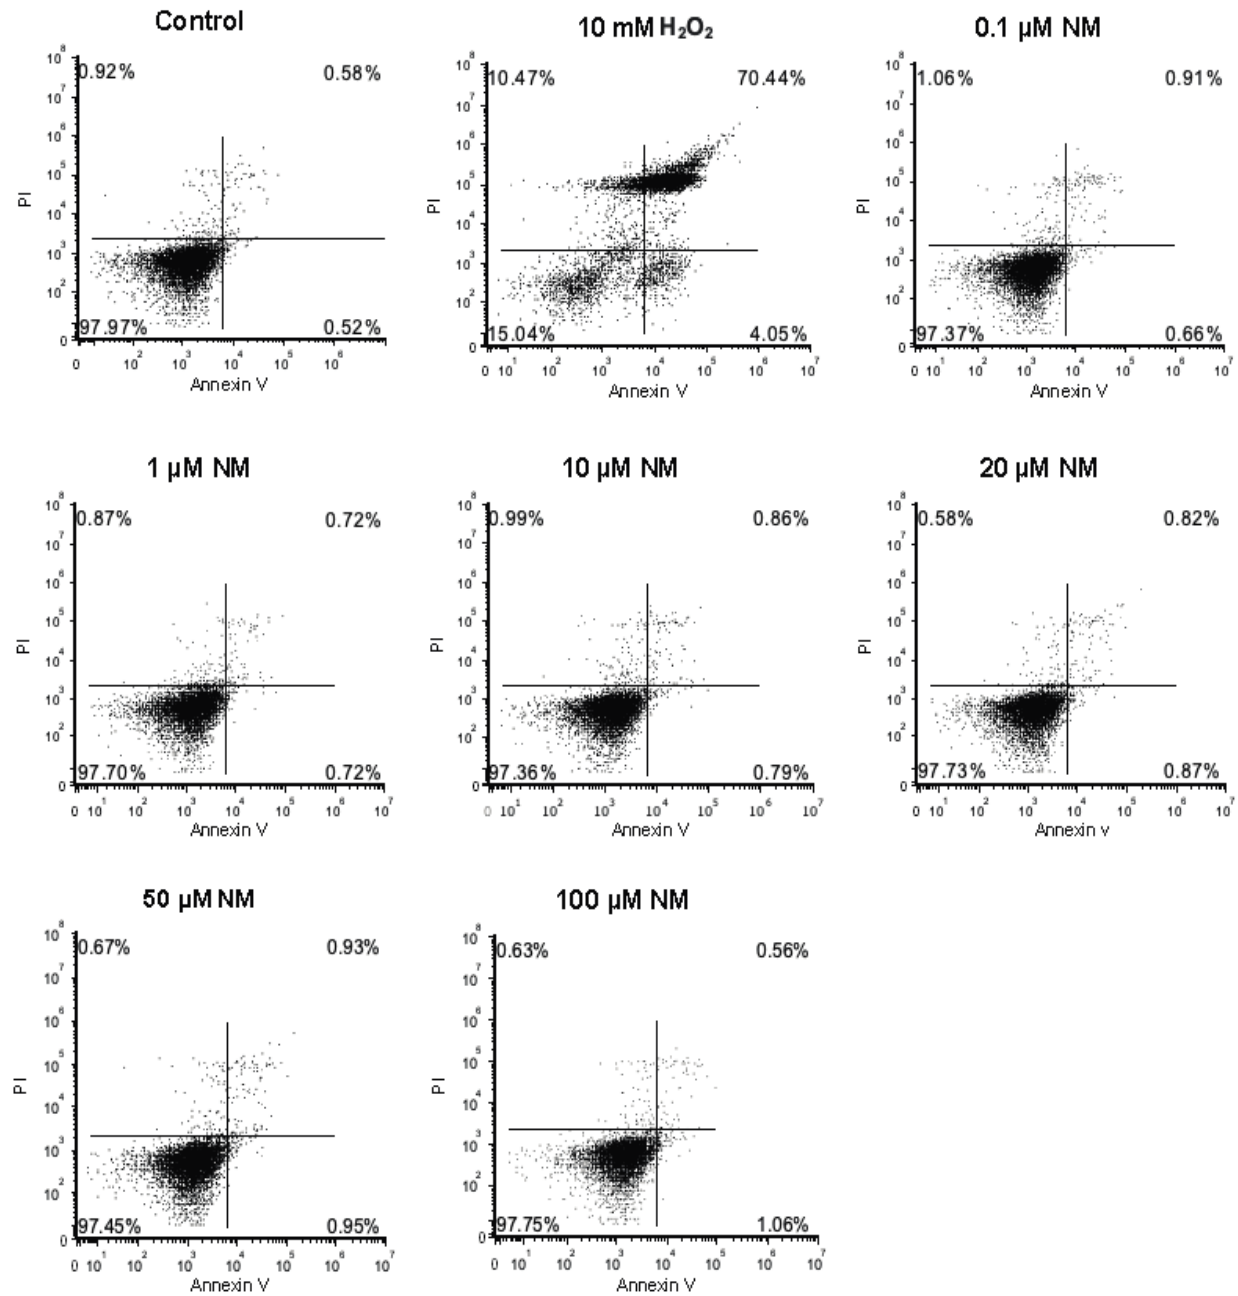

Figure S5. Nitrogen mustard exposure for 1 h does not cause cell death in BMMCs.

Cell death was measured by staining BMMCs with propidium iodide (PI) which measures necrosis and Annexin V which measures apoptosis after NM exposure. BMMCs were exposed to nitrogen mustard (concentrations 0.1  $\mu\text{M}$  - 100  $\mu\text{M}$ ) for 1 h. The cells were washed, stained and processed for flow cytometer. Plots are a representation of the biological replicates ( $n \geq 3$ ).



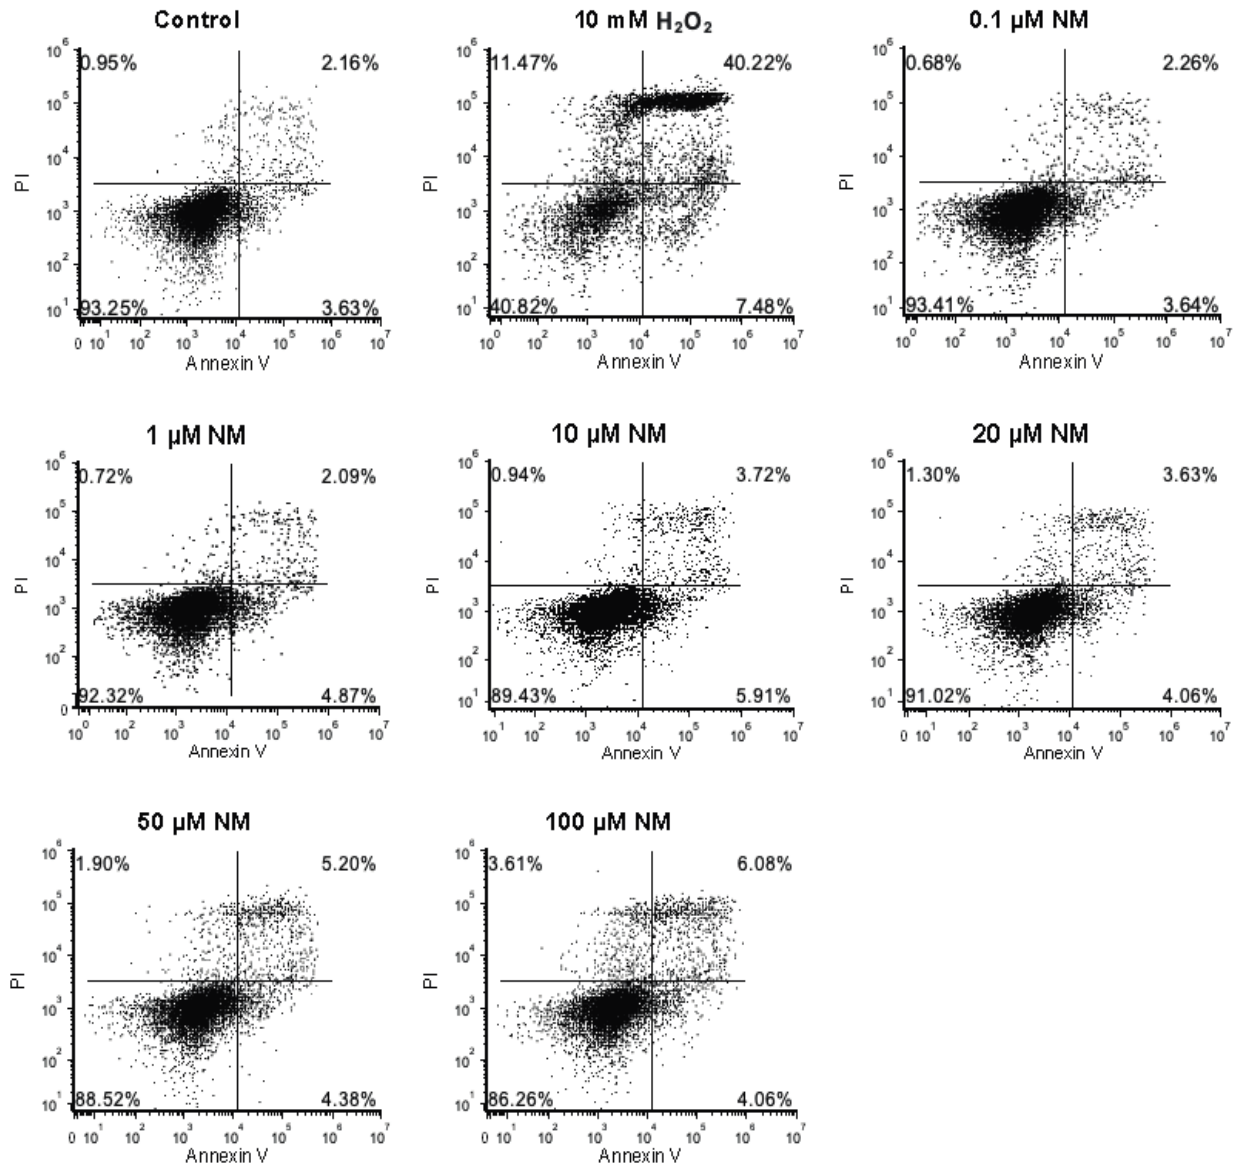

Figure S6. Nitrogen mustard exposure for 6h does not cause cell death in BMBCs

Cell death was measured by staining BMBCs with propidium iodide (PI) which measures necrosis and Annexin V which measures apoptosis after NM exposure. BMBCs were exposed to nitrogen mustard (concentrations 0.1 μM - 100 μM) for 6 h. The cells were washed, stained and processed for flow cytometer. Plots are a representation of the biological replicates (n ≥ 3).

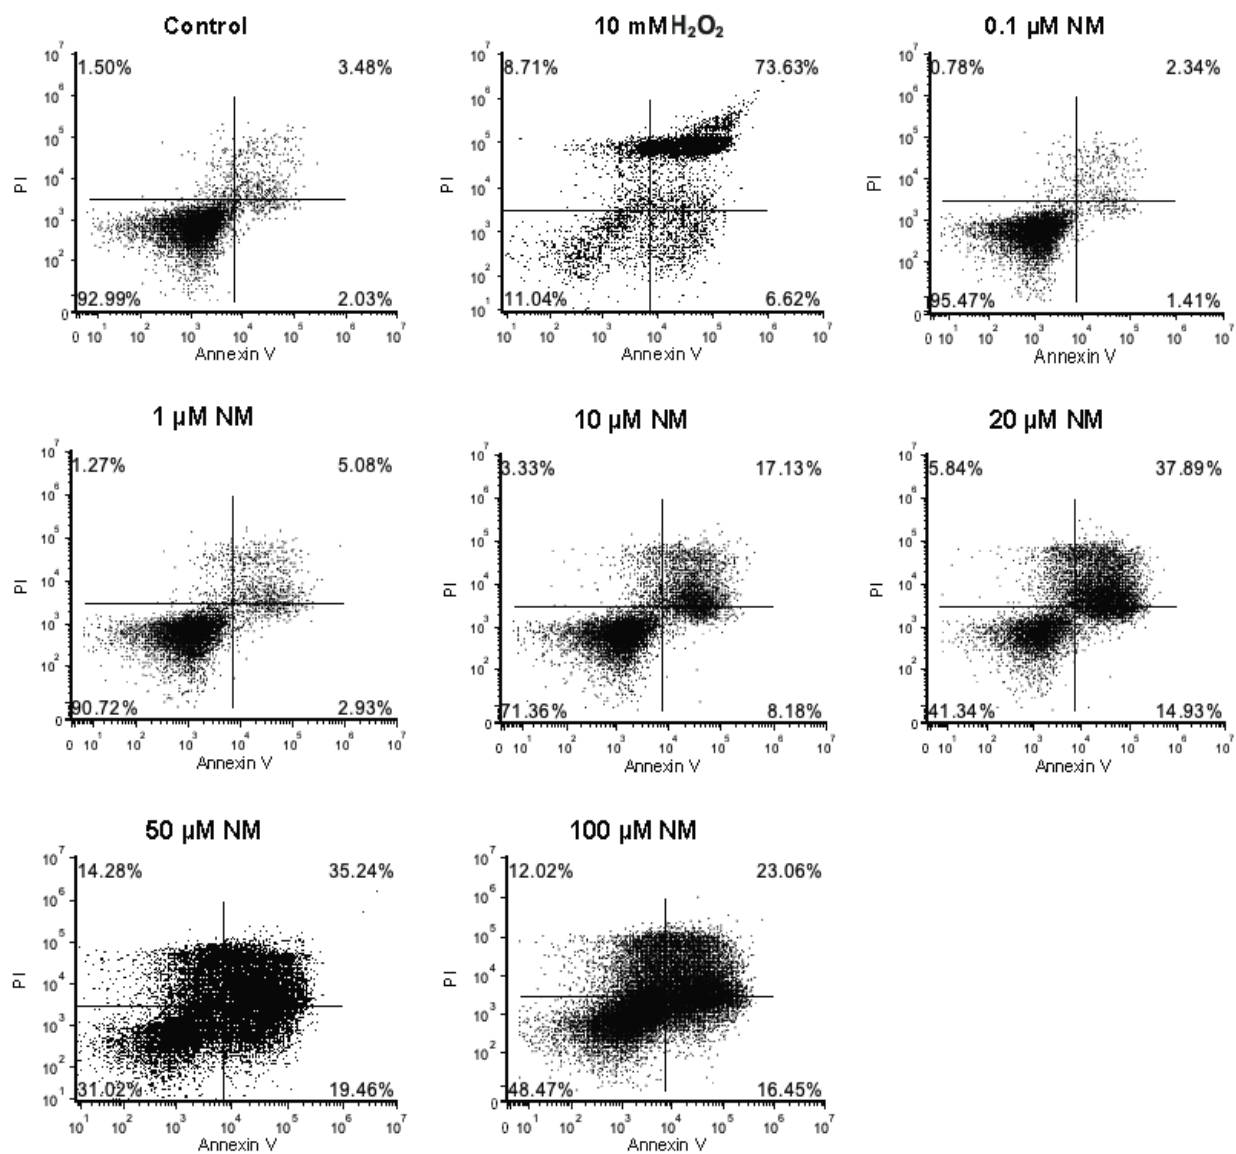

Figure S7. Nitrogen mustard exposure for 24h caused cell death in BMSCs.

Cell death was measured by staining BMMCs with propidium iodide (PI) which measures necrosis and Annexin V which measures apoptosis after NM exposure. BMMCs were exposed to nitrogen mustard (concentrations 0.1  $\mu\text{M}$  - 100  $\mu\text{M}$ ) for 24 h. The cells were washed, stained and processed for flow cytometer. Plots are a representation of the replicates ( $n \geq 3$ ).

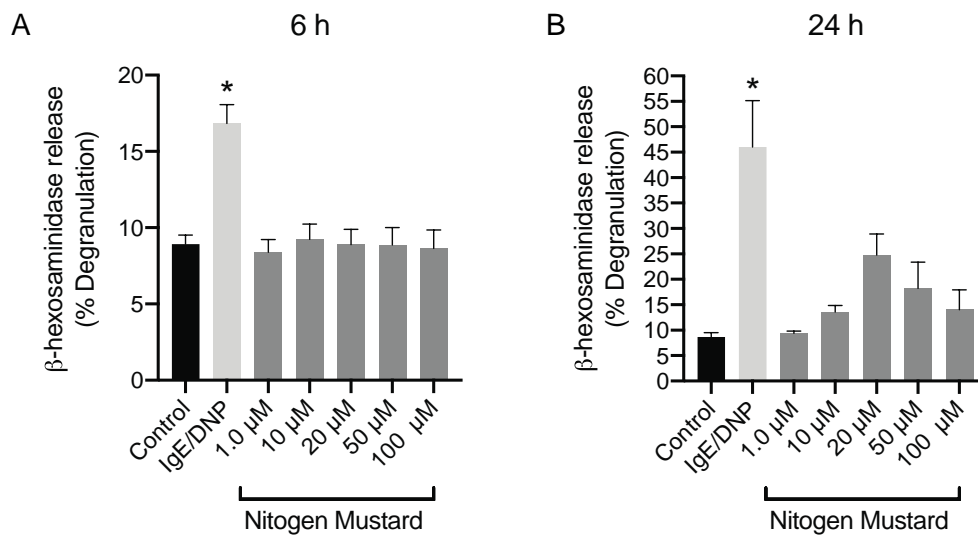

Figure S8. Nitrogen mustard does not cause degranulation at 6 h but degranulation is observed at 24 h at toxic doses *in vitro*.

Degranulation was assessed through the release of  $\beta$ -hexosaminidase (lysosomal enzyme) which was measured in supernatants relative to lysed cells in BMMCs. (A) At 6 h NM exposure,  $\beta$ -hexosaminidase exhibited no differences compared to control. (B) At 24 h there was an increasing trend in degranulation at 20  $\mu\text{M}$  – 50  $\mu\text{M}$ . Data is presented as the mean  $\pm$  SEM ( $n=3$ ); one way ANOVA with Dunnett's *post hoc* test,  $*p \leq 0.05$  treatments compared to control.
